# Supplementary material for: Genetic inactivation of ANGPTL4 improves glucose homeostasis and is associated with reduced risk of diabetes
Source: PubMed Central journal article supplement (PMC5997992; doi:10.1038/s41467-018-04611-z), 2018-06-13
Supplement: 41467_2018_4611_MOESM1_ESM.pdf [file 41467_2018_4611_MOESM1_ESM.pdf]

## Supplementary Information

Gusarova V, et al. Genetic Inactivation of ANGPTL4 Improves Glucose Homeostasis and Reduces Risk of Type 2 Diabetes.

## ***Supplementary Note 1***

### **Additional Acknowledgements:**

DiscovEHR: The authors would like to thank the MyCode® Community Health Initiative participants for their permission to utilize their health and genomics information in the DiscovEHR collaboration. The DiscovEHR study was funded in whole by Regeneron Pharmaceuticals.

TAICHI Study: The TAICHI study was supported by grants from the National Health Research Institutes, Taiwan (PH-099-PP-03, PH-100-PP-03, and PH-101-PP-03); the National Science Council, Taiwan (NSC 101-2314-B-075A-006-MY3, MOST 104-2314-B-075A-006-MY3, MOST 104-2314-B-075A-007, and MOST 105-2314-B-075A-003); and the Taichung Veterans General Hospital, Taiwan (TCVGH-1020101C, TCVGH-1020102D, TCVGH-1023102B, TCVGH-1023107D, TCVGH-1030101C, TCVGH-1030105D, TCVGH-1033503C, TCVGH-1033102B, TCVGH-1033108D, TCVGH-1040101C, TCVGH-1040102D, TCVGH-1043504C, and TCVGH-1043104B); it was also supported in part by the National Center for Advancing Translational Sciences (CTSI grant UL1TR001881).

T2D-Genes/GoT2D/DIAGRAM/SIGMA: J.C.F. is a Massachusetts General Hospital Research Scholar. M.I.McC. is a Wellcome Trust Senior Investigator. A.P.M. is a Wellcome Trust Senior Fellow under award WT098017. This work was supported by NIH grants DK062370, 1RC2DK0888389, U54HG003067, U01-DK085526, U01-DK085501, U01-DK085524, U01-DK085545, U01-DK085584, and by Wellcome Trust Grants 090532, 098381, 090367. The exome sequencing project in Mexican samples (SIGMA) was conducted as part of the Slim Initiative for Genomic Medicine, a project funded by the Fundación Carlos Slim in Mexico and partial funding for CONACyT grants 138826 and 128877.

HUNT study: The Nord-Trøndelag Health Study (The HUNT Study) is a collaboration between the HUNT Research Centre (Faculty of Medicine, Norwegian University of Science and Technology NTNU), the Nord-Trøndelag County Council, the Central Norway Health Authority and the Norwegian Institute of Public Health.

Malmö Diet and Cancer Study: This work was supported by grants from the European Research Council (consolidator grant 649021, Orho-Melander); Swedish Research Council (Orho-Melander and Melander); Swedish Heart and Lung Foundation (Orho-Melander and Melander); Knut and Alice Wallenberg Foundation-Clinical Scholar grant (Melander); Gustafsson Foundation (Melander).

United Kingdom Biobank: The authors would like to thank the UKBiobank and its participants for creating an open scientific resource for the research community. S.K. is supported by a Research Scholar award from the Massachusetts General Hospital, the Donovan Family Foundation, and R21HL120781.

Copenhagen Population Studies: The authors would like to thank the staff and participants of the Copenhagen General Population Study, the Copenhagen City Heart Study, and the Copenhagen Ischemic Heart Disease Study, collectively referred to as the Copenhagen General Population Studies.

## Supplementary Tables

| <b>Supplementary Table 1. Clinical characteristics of 58,124 sequenced DiscovEHR study participants of European ancestry</b>                                                                                                                                                                                                                                                                                                                                                                                                                                                                                                                                                                                                                                                                                                                                  |                   |
|---------------------------------------------------------------------------------------------------------------------------------------------------------------------------------------------------------------------------------------------------------------------------------------------------------------------------------------------------------------------------------------------------------------------------------------------------------------------------------------------------------------------------------------------------------------------------------------------------------------------------------------------------------------------------------------------------------------------------------------------------------------------------------------------------------------------------------------------------------------|-------------------|
| Age, year, median (IQR)                                                                                                                                                                                                                                                                                                                                                                                                                                                                                                                                                                                                                                                                                                                                                                                                                                       | 61.3 (47.7-72.5)  |
| Female sex, n (%)                                                                                                                                                                                                                                                                                                                                                                                                                                                                                                                                                                                                                                                                                                                                                                                                                                             | 34,549 (59.4%)    |
| BMI, kg/m <sup>2</sup> , median (IQR)                                                                                                                                                                                                                                                                                                                                                                                                                                                                                                                                                                                                                                                                                                                                                                                                                         | 30.3 (26.1-35.7)  |
| Fasting glucose, non-diabetic individuals, mg/dl, median (IQR)                                                                                                                                                                                                                                                                                                                                                                                                                                                                                                                                                                                                                                                                                                                                                                                                | 94.0 (89.0-100.5) |
| Current smoker, n (%)                                                                                                                                                                                                                                                                                                                                                                                                                                                                                                                                                                                                                                                                                                                                                                                                                                         | 10,172 (17.5%)    |
| <b>Medications</b>                                                                                                                                                                                                                                                                                                                                                                                                                                                                                                                                                                                                                                                                                                                                                                                                                                            |                   |
| Lipid lowering medication, n (%)                                                                                                                                                                                                                                                                                                                                                                                                                                                                                                                                                                                                                                                                                                                                                                                                                              | 21,898 (37.7%)    |
| Anti-hypertensive medication, n (%)                                                                                                                                                                                                                                                                                                                                                                                                                                                                                                                                                                                                                                                                                                                                                                                                                           | 27,272 (46.9%)    |
| Hypoglycemic medication, n (%)                                                                                                                                                                                                                                                                                                                                                                                                                                                                                                                                                                                                                                                                                                                                                                                                                                | 15,678 (27.0%)    |
| <b>Medical history</b>                                                                                                                                                                                                                                                                                                                                                                                                                                                                                                                                                                                                                                                                                                                                                                                                                                        |                   |
| Coronary artery disease, n (%) <sup>†</sup>                                                                                                                                                                                                                                                                                                                                                                                                                                                                                                                                                                                                                                                                                                                                                                                                                   | 13,626 (23.4%)    |
| Hypertension, n (%) <sup>‡</sup>                                                                                                                                                                                                                                                                                                                                                                                                                                                                                                                                                                                                                                                                                                                                                                                                                              | 35,395 (60.9%)    |
| Type 2 Diabetes, n (%) <sup>§</sup>                                                                                                                                                                                                                                                                                                                                                                                                                                                                                                                                                                                                                                                                                                                                                                                                                           | 12,969 (22.3%)    |
| <p><sup>†</sup>Participants were considered to have coronary artery disease if they had a history of coronary revascularization in the electronic health record, or history of acute coronary syndrome or exertional angina with angiographic evidence of obstructive coronary atherosclerosis. <sup>‡</sup>Participants were considered to have hypertension if they had a history of hypertension in the electronic health record, antihypertensive medication use, or systolic blood pressure greater than 140 mmHg or diastolic blood pressure greater than 90 mmHg. <sup>§</sup>Participants were considered to have diabetes if they had at least 2 out of (i) a history of type 2 diabetes in the electronic health record, (ii) antidiabetic medication use, or (iii) fasting glucose greater than 126 mg/dl or hemoglobin A1c greater than 6.5%.</p> |                   |

**Supplementary Table 2. Rare predicted loss of function variants in *ANGPTL4***

| Chromosome | Position | Mutation    | Mutation Type    | Carriers |
|------------|----------|-------------|------------------|----------|
| 19         | 8364556  | p.Cys80fs   | Frameshift indel | 1        |
| 19         | 8364625  | p.His103fs  | Frameshift indel | 1        |
| 19         | 8365994  | p.His121fs  | Frameshift indel | 1        |
| 19         | 8366041  | p.Arg136Ter | Nonsense         | 2        |
| 19         | 8366063  | p.Gln143fs  | Frameshift indel | 2        |
| 19         | 8366280  | p.Gln170Ter | Nonsense         | 6        |
| 19         | 8366320  | c.547+1G>A  | Splice donor     | 11       |
| 19         | 8369290  | p.Gln207fs  | Frameshift indel | 1        |
| 19         | 8369320  | p.Lys217Ter | Nonsense         | 1        |
| 19         | 8371116  | p.Trp241Ter | Nonsense         | 1        |
| 19         | 8371240  | c.758-1G>T  | Splice acceptor  | 2        |
| 19         | 8371418  | p.Gly313fs  | Frameshift indel | 69       |
| 19         | 8371437  | p.Ser320fs  | Frameshift indel | 1        |
| 19         | 8373703  | c.1040-2A>G | Splice acceptor  | 10       |
| 19         | 8373715  | p.Trp350Ter | Nonsense         | 1        |
| 19         | 8373720  | p.Thr353fs  | Frameshift indel | 1        |
| 19         | 8373744  | p.Gln362fs  | Frameshift indel | 2        |
| 19         | 8373754  | p.Tyr363Ter | Nonsense         | 3        |
| 19         | 8373770  | p.Gln369Ter | Nonsense         | 6        |
| 19         | 8373826  | p.Tyr387Ter | Nonsense         | 2        |
| 19         | 8373878  | p.Ser406fs  | Frameshift indel | 1        |
| Total      |          |             |                  | 125      |

**Supplementary Table 3. Age distribution of DiscovEHR participants**

| <b>Cohort</b>                | <b>Median (IQR)<br/>age, cases</b> | <b>Median (IQR)<br/>age, controls</b> | <b>Median (IQR)<br/>age, E40<br/>homozygotes</b> | <b>Median (IQR)<br/>age, E40K<br/>heterozygotes</b> | <b>Median (IQR)<br/>age, K40<br/>homozygotes</b> |
|------------------------------|------------------------------------|---------------------------------------|--------------------------------------------------|-----------------------------------------------------|--------------------------------------------------|
| DiscovEHR study              | 67.5 (18.4)                        | 58.7 (26.7)                           | 59.3 (25.6)                                      | 59.3 (25.8)                                         | 66.1 (23.9)                                      |
| DiscovEHR replication cohort | 63.6 (17.3)                        | 51.8 (27.5)                           | 61.7 (24.7)                                      | 61.3 (24.5)                                         | 66.7 (21.4)                                      |
| Combined                     | 63.6 (17.3)                        | 51.8 (27.5)                           | 54.1 (26.8)                                      | 54.4 (27.1)                                         | 61.6 (22.2)                                      |

Abbreviations: IQR, interquartile range.

**Supplementary Table 4. Studies for association of p.E40K with type 2 diabetes and glucose**

| Study                                 | Ancestry           | Allele frequency - rs116843064 | T2D Case definition                                                                                                                                                                                                                                                                                                                                                                                                                                            | T2D Cases | T2D Controls | Genotyping method                                                                                                                    |
|---------------------------------------|--------------------|--------------------------------|----------------------------------------------------------------------------------------------------------------------------------------------------------------------------------------------------------------------------------------------------------------------------------------------------------------------------------------------------------------------------------------------------------------------------------------------------------------|-----------|--------------|--------------------------------------------------------------------------------------------------------------------------------------|
| DiscovEHR Study                       | European American  | 0.02                           | At least 2 out of (i) a history of type 2 diabetes in the electronic health record, (ii) antidiabetic medication use, or (iii) fasting glucose greater than 126 mg/dl or hemoglobin A1c greater than 6.5%.                                                                                                                                                                                                                                                     | 12,945    | 36,165       | Whole exome sequencing                                                                                                               |
| T2D-Genes/GoT2D/DIAGRAM               | Multiple           | 0.0211                         | Multiple                                                                                                                                                                                                                                                                                                                                                                                                                                                       | 34,809    | 57,985       | Exome array+exome sequencing                                                                                                         |
| Copenhagen General Population Studies | Danish European    | 0.0260                         | ICD code of type 2 diabetes (ICD-8 code 250; ICD-10 code E11; E13 or E14) on the basis of data in the national Danish Patient Registry or the national Danish Causes of Death Registry, self-reported diabetes, use of antidiabetic drugs, or a non-fasting plasma glucose concentration of greater than 11 mmol/l.                                                                                                                                            | 7,838     | 107,246      | TaqMan-based assay, allele-specific PCR                                                                                              |
| deCODE                                | Icelandic          | 0.0243                         | Clinician-confirmed type 2 diabetes, or type 2 diabetes oral medication x 3 or more (or x 2 and current), or HbA1c x2 or more at least 6.5%, or HbA1c once at least 6.5% and oral medication (if information available) and either self-reported type 2 diabetes diagnoses or hospital discharge diagnoses of type 2 diabetes, and with confirmed type 1 diabetes diagnoses excluded.                                                                          | 6,808     | 72,309       | HumanHap300, HumanCNV370, HumanHap610, HumanHap1M, HumanHap660, Omni-1, Omni 2.5 or Omni Express, whole genome sequencing+imputation |
| The HUNT Study                        | Norwegian European | 0.0292                         | Persons with 1) an ICD9 (1987-1999) or ICD10 (1999-2016) code specific for type 2 diabetes obtained from local hospitals, 2) a non-fasting capillary or serum glucose measurement >11.1 mmol/L (200mg/dL) obtained from one of three HUNT health surveys (1984-1986, 1995-1997 and 2006-2008), or 3) a HbA1c value ≥ 6.5% (7.0 mmol/L) obtained from a subset of persons at one HUNT health survey (1995-1997). All other persons were considered as controls. | 4,761     | 56,837       | Exome array                                                                                                                          |
| Malmö Diet and Cancer Study           | Swedish European   | 0.0282                         | Self report of physician diagnosis of diabetes or being on antidiabetic medication or having a fasting plasma glucose >7.0mmol/L or being registered in any of 6 different Swedish registers of diabetes diagnosis (11).                                                                                                                                                                                                                                       | 4,854     | 23,060       | Exome array                                                                                                                          |
| UK Biobank                            | British European   | 0.0193                         | Report of diabetes unspecified or type 2 diabetes during verbal interview with trained nurse or current use of antidiabetic medication.                                                                                                                                                                                                                                                                                                                        | 5,741     | 106,597      | UK biobank array+UK BiLEVE array                                                                                                     |
| EPIC InterAct Core-Exome              | British European   | 0.0259                         | Report of type 2 diabetes from two or more of the following: self-report, linkage to primary care registers, secondary care registers, medication use (drug registers), hospital admissions and mortality data.                                                                                                                                                                                                                                                | 5,143     | 7,300        | Core Exome array                                                                                                                     |
| DiscovEHR 30K replication cohort      | European American  | 0.0214                         | At least 2 out of (i) a history of type 2 diabetes in the electronic health record, (ii) antidiabetic medication use, or (iii) fasting glucose greater than 126 mg/dl or hemoglobin A1c greater than 6.5%.                                                                                                                                                                                                                                                     | 3,456     | 22,372       | Whole exome sequencing                                                                                                               |
| EPIC InterAct Quad660                 | British European   | 0.0250                         | Report of type 2 diabetes from two or more of the following: self-report, linkage to primary care registers, secondary care registers, medication use (drug registers), hospital admissions and mortality data.                                                                                                                                                                                                                                                | 4,257     | 4,293        | Quad660 array+imputation                                                                                                             |
| MGI                                   | European American  | 0.0194                         | eMERGE (1)                                                                                                                                                                                                                                                                                                                                                                                                                                                     | 1,389     | 12,289       | Exome array                                                                                                                          |
| Duke                                  | European American  | 0.0168                         | Clinical assessment by cardiology fellow at the time of cardiac catheterization, based upon clinical information and judgement.                                                                                                                                                                                                                                                                                                                                | 1,630     | 4,903        | Whole exome sequencing                                                                                                               |
| EPIC-Norfolk                          | British European   | 0.0179                         | Report of type 2 diabetes from: self-report, linkage to primary care registers, secondary care registers, medication use (drug registers), hospital admissions and mortality data.                                                                                                                                                                                                                                                                             | 1,347     | 19,504       | UK Biobank array                                                                                                                     |
| UPenn                                 | European American  | 0.0177                         | At least 2 out of (i) a history of type 2 diabetes in the electronic health record, (ii) antidiabetic medication use, or (iii) fasting glucose greater than 126 mg/dl or hemoglobin A1c greater than 6.5%.                                                                                                                                                                                                                                                     | 733       | 4,066        | Whole exome sequencing                                                                                                               |

Abbreviations: T2D, type 2 diabetes.

**Supplementary Table 5. Associations of p.E40K with fasting glucose**

| <b>Study</b>                      | <b>Scale</b>   | <b>Beta</b> | <b>SE</b> | <b>P Value</b> | <b>N</b> |
|-----------------------------------|----------------|-------------|-----------|----------------|----------|
| DiscovEHR                         | log10(mg/dl)   | -0.001      | 0.001     | 0.38           | 26,644   |
| DiscovEHR 30K replication         | mg/dl          | 0.132       | 0.375     | 0.73           | 13,732   |
| UPenn                             | log10(mg/dl)   | -0.012      | 0.007     | 0.10           | 5,782    |
| T2D-Genes/GoT2D/DIAGRAM           | mmol/l         | -0.021      | 0.011     | 0.06           | 33,245   |
| Malmo Diet and Cancer Study       | log10(mmol/l)  | -0.009      | 0.057     | 0.87           | 4,848    |
| The HUNT study                    | log10(mmol/l)  | -0.0002     | 0.004     | 1.00           | 2,714    |
| deCODE                            | Standard units | -0.005      | 0.0019    | 0.010          | 33,085   |
| Meta-analysis                     |                |             |           | 0.0024         | 120,050  |
| Abbreviations: SE, standard error |                |             |           |                |          |



**Supplementary Table 6. Associations of p.E40K with oral glucose tolerance test measures of glucose metabolism**

| Trait                     | N    | Beta<br>(Z score units) | SE     | P Value |
|---------------------------|------|-------------------------|--------|---------|
| Glucose, 0 min (mmol/L)   | 8079 | -0.0135                 | 0.0465 | 0.77    |
| Glucose, 30 min (mmol/L)  | 8081 | -0.0293                 | 0.0445 | 0.51    |
| Glucose, 120 min (mmol/L) | 8069 | -0.0537                 | 0.0459 | 0.24    |
| Insulin, 0 min (mU/L)     | 8025 | -0.0739                 | 0.0431 | 0.086   |
| Insulin, 30 min (mU/L)    | 7922 | -0.1472                 | 0.0459 | 0.0013  |
| Insulin, 120 min (mU/L)   | 7899 | -0.1068                 | 0.0445 | 0.017   |
| HOMA-IR                   | 8023 | -0.0719                 | 0.0432 | 0.096   |
| Insulinogenic index       | 7886 | -0.1466                 | 0.0474 | 0.002   |
| Insulin sensitivity index | 7912 | 0.1292                  | 0.0430 | 0.0026  |
| Disposition index         | 7886 | -0.0370                 | 0.0463 | 0.42    |

All the traits were rank inverse transformed and converted to Z score units. Association analyses were performed using linear mixed models of association adjusted for age, sex and body mass index. A genetic relatedness matrix was included in each model as a random-effects covariate. Abbreviations: HOMA-IR, homeostatic model assessment of insulin resistance; SE, standard error.

| <b>Supplementary Table 7. Studies for association of <i>ANGPTL4</i> predicted loss of function variants with type 2 diabetes</b> |                   |                                                                                                                                                                                                            |                  |                     |                                              |
|----------------------------------------------------------------------------------------------------------------------------------|-------------------|------------------------------------------------------------------------------------------------------------------------------------------------------------------------------------------------------------|------------------|---------------------|----------------------------------------------|
| <b>Study</b>                                                                                                                     | <b>Ancestry</b>   | <b>T2D Case definition</b>                                                                                                                                                                                 | <b>T2D Cases</b> | <b>T2D Controls</b> | <b>Ascertainment of <i>ANGPTL4</i> pLoFs</b> |
| DiscovEHR Study                                                                                                                  | European American | At least 2 out of (i) a history of type 2 diabetes in the electronic health record, (ii) antidiabetic medication use, or (iii) fasting glucose greater than 126 mg/dl or hemoglobin A1c greater than 6.5%. | 12,969           | 36,217              | Whole exome sequencing                       |
| DiscovEHR 30K replication cohort                                                                                                 | European American | At least 2 out of (i) a history of type 2 diabetes in the electronic health record, (ii) antidiabetic medication use, or (iii) fasting glucose greater than 126 mg/dl or hemoglobin A1c greater than 6.5%. | 3,456            | 22,372              | Whole exome sequencing                       |
| UPenn                                                                                                                            | European American | At least 2 out of (i) a history of type 2 diabetes in the electronic health record, (ii) antidiabetic medication use, or (iii) fasting glucose greater than 126 mg/dl or hemoglobin A1c greater than 6.5%. | 734              | 4,066               | Whole exome sequencing                       |
| Duke                                                                                                                             | European American | Clinical assessment by cardiology fellow at the time of cardiac catheterization, based upon clinical information and judgement.                                                                            | 1,630            | 4,903               | Whole exome sequencing                       |
| TAICHI                                                                                                                           | Taiwanese Chinese | Fasting glucose > 126 mg/dl or 2 hour post-prandial glucose > 200 mg/dl, or on antidiabetic medication                                                                                                     | 4,392            | 4,699               | Whole exome sequencing                       |
| T2D-Genes/GoT2D/SIGMA                                                                                                            | Multiple          | Multiple                                                                                                                                                                                                   | 8,373            | 8,466               | Whole exome sequencing                       |
| Dallas Heart Study                                                                                                               | Multiple          | Fasting glucose > 126 mg/dl or on antidiabetic medication                                                                                                                                                  | 461              | 3,283               | Whole exome sequencing                       |
| Abbreviations: pLoFs, predicted loss of function variants                                                                        |                   |                                                                                                                                                                                                            |                  |                     |                                              |

## Supplementary Figures

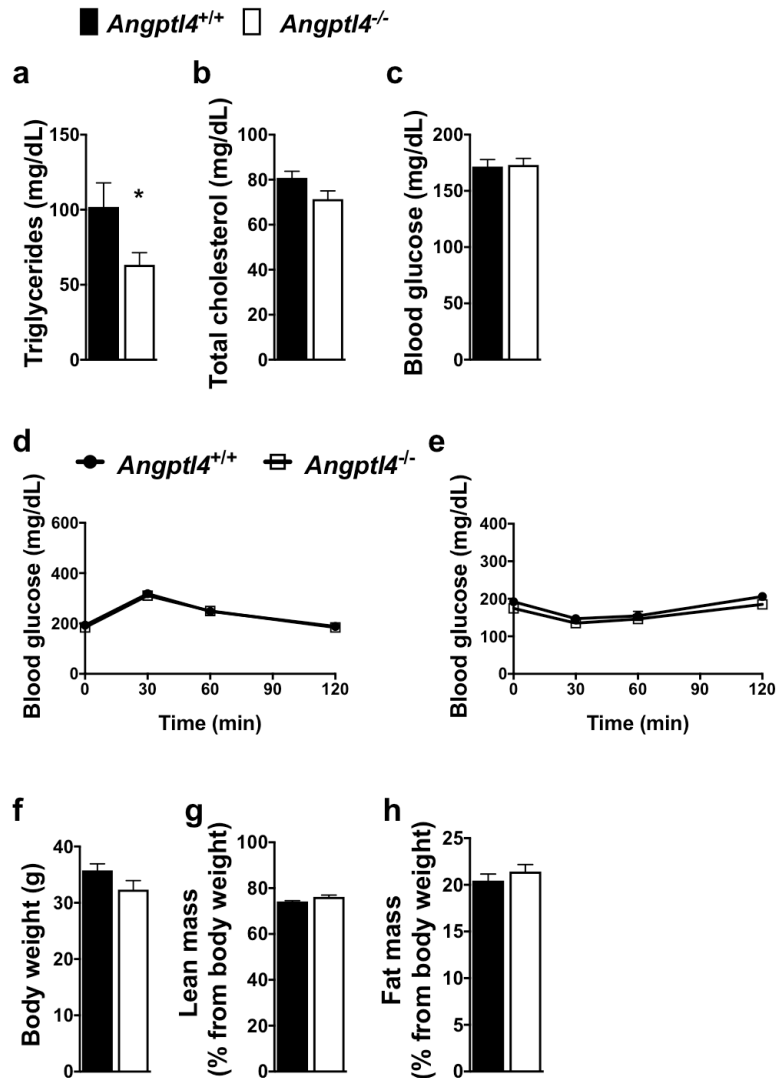

**Supplementary Figure 1. *Angptl4*<sup>-/-</sup> mice on chow diet have reduced serum triglycerides and no change in glycemic control.** (a) Serum triglycerides, (b) total cholesterol and (c) blood glucose levels in *Angptl4*<sup>-/-</sup> and control mice on chow diet. (d) Oral glucose tolerance test and (e) insulin tolerance test in the animals described in (a-c). (f) body weight, (g) lean and (h) fat mass in *Angptl4*<sup>-/-</sup> and their wildtype littermates. All groups had 9-11 animals. Values are mean ± SEM. Statistical analysis by Welch's t-test (a) and 2-way ANOVA with Sidak's post-test (d and e), \*p < 0.05.

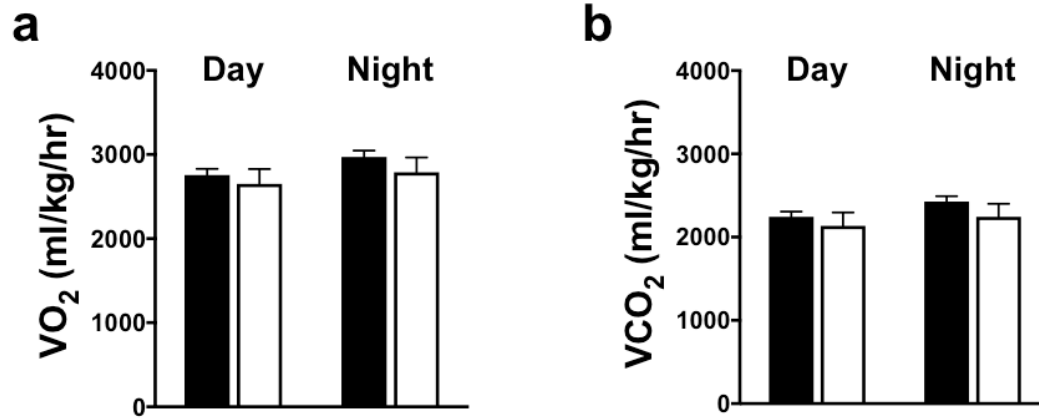

**Supplementary Figure 2. *Angptl4*<sup>-/-</sup> mice on high-fat diet have no changes in O<sub>2</sub> consumption and CO<sub>2</sub> production.** (a) O<sub>2</sub> consumption and (b) CO<sub>2</sub> production were evaluated during light and dark cycles in *Angptl4*<sup>-/-</sup> mice on high-fat diet. All values are mean ± SEM.
