# Supplementary material for: Genetic inactivation of ANGPTL4 improves glucose homeostasis and is associated with reduced risk of diabetes
Source: PubMed Central journal article supplement (PMC5997992; doi:10.1038/s41467-018-04611-z), 2018-06-13
Supplement: 41467_2018_4611_MOESM2_ESM.pdf [file 41467_2018_4611_MOESM2_ESM.pdf]

## **Description of Additional Supplementary Files**

File Name: Supplementary Data 1

Description: Clinical characteristics of ANGPTL4 p.E40K homozygotes.

File Name: Supplementary Data 2

Description: Phenome-wide association analyses of p.E40K with disease diagnoses in DiscovEHR.

File Name: Supplementary Data 3

Description: Phenome-wide association analyses of p.E40K with clinical measurements in DiscovEHR
